# Supplementary material for: Control of RAB7 activity and localization through the retromer‐TBC1D5 complex enables RAB7‐dependent mitophagy
Source: PubMed Central journal article supplement (PMC5770787; doi:10.15252/embj.201797128), 2017-11-20

Figure 1D: mito isolation

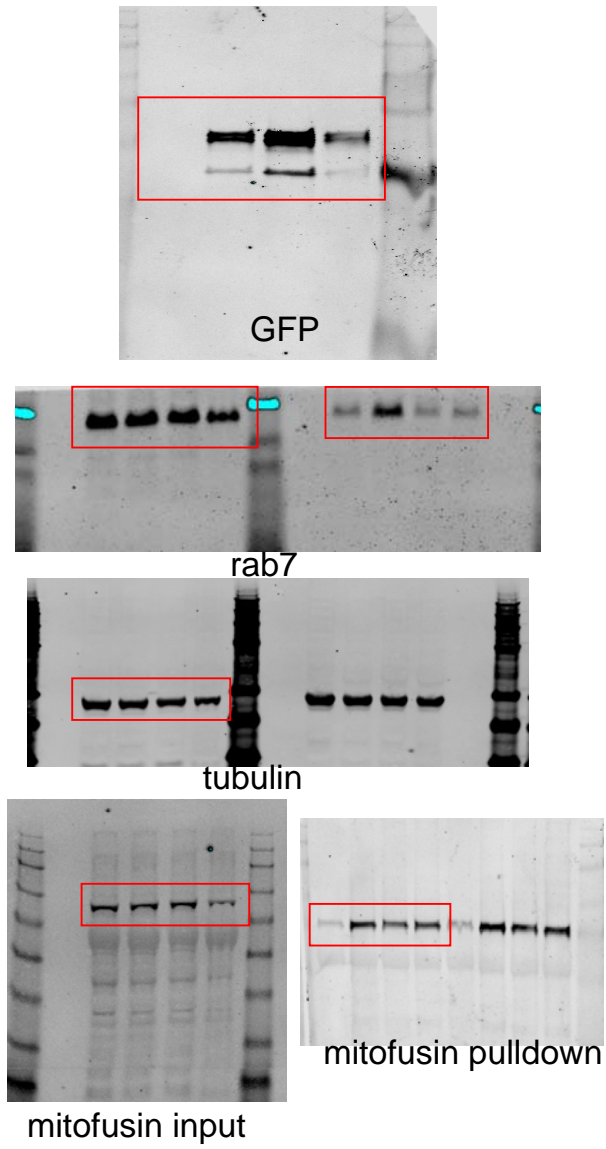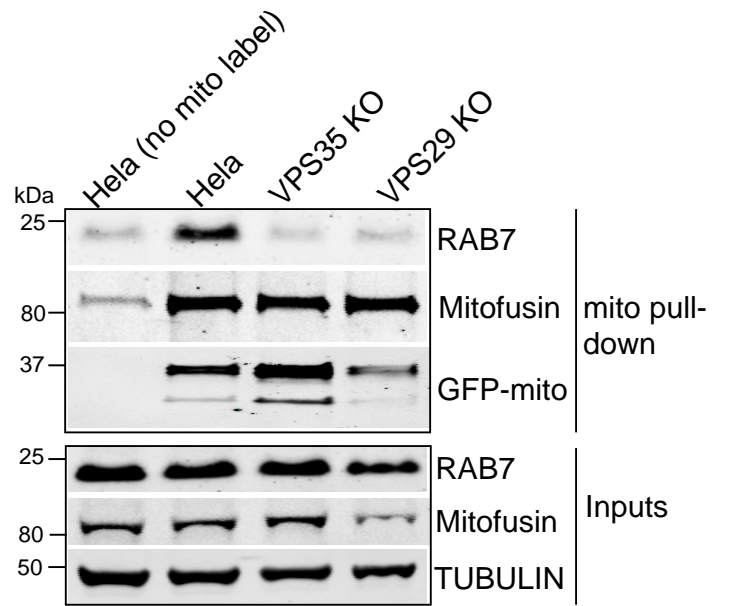

Supplement: EMBJ-37-235-s005.pdf [file EMBJ-37-235-s005.pdf]
