# Supplementary material for: Control of RAB7 activity and localization through the retromer‐TBC1D5 complex enables RAB7‐dependent mitophagy
Source: PubMed Central journal article supplement (PMC5770787; doi:10.15252/embj.201797128), 2017-11-20
Supplement: EMBJ-37-235-s008.pdf [file EMBJ-37-235-s008.pdf]

Figure 4A: VPS29 and TBC1D5 IPs

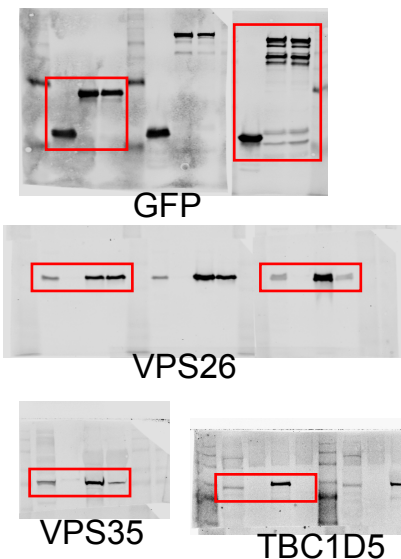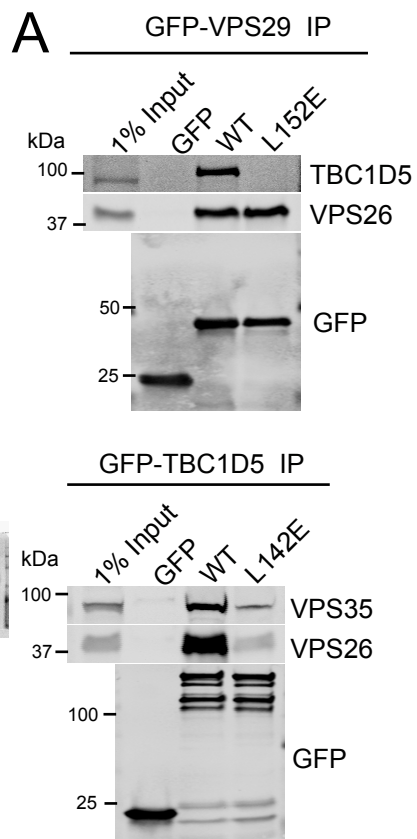

Figure 4B: VPS29 rescue RILP assay:

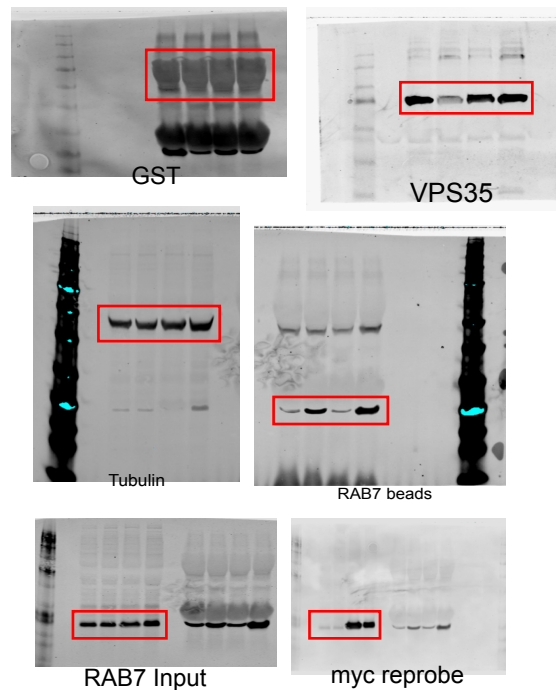

**B**

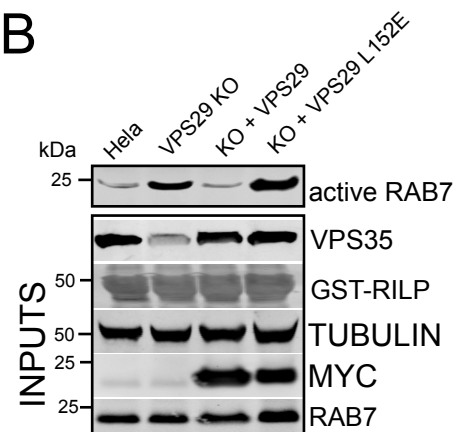

Figure 4 E: TBC1D5 KO RILP assays

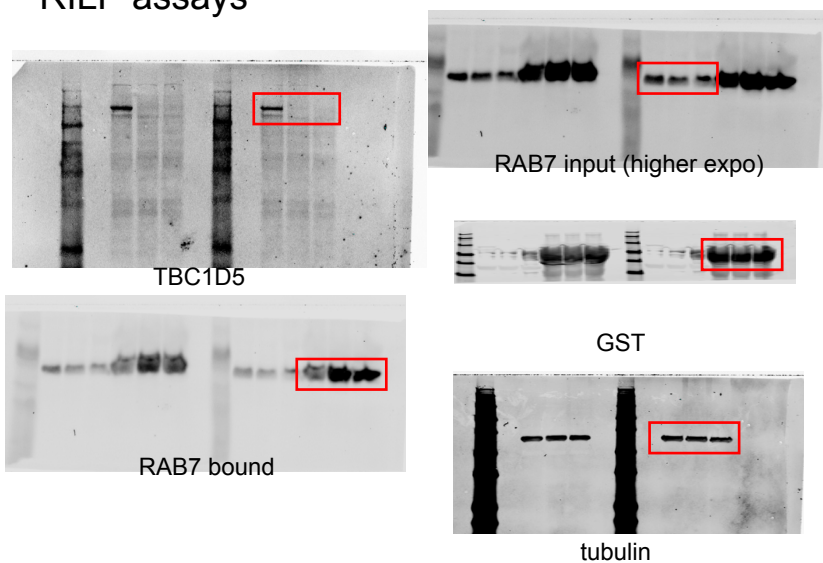

**E**

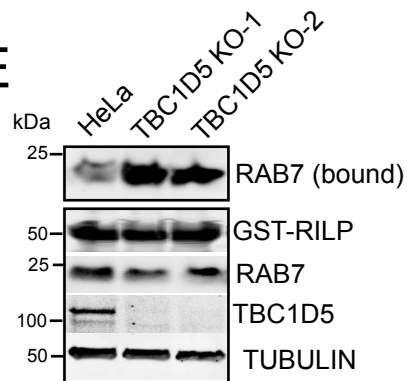

Figure 4F: TBC1D5 RILP rescues

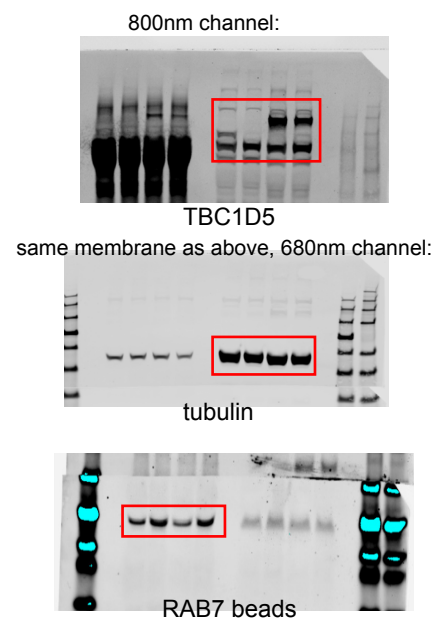

**F**

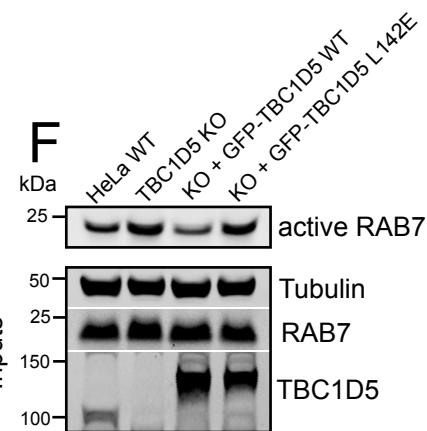

RAB7 inputs, same membrane as on the left, but higher expo
