# Supplementary material for: Control of RAB7 activity and localization through the retromer‐TBC1D5 complex enables RAB7‐dependent mitophagy
Source: PubMed Central journal article supplement (PMC5770787; doi:10.15252/embj.201797128), 2017-11-20

Figure 5B: GLUT1  
surface rescues:

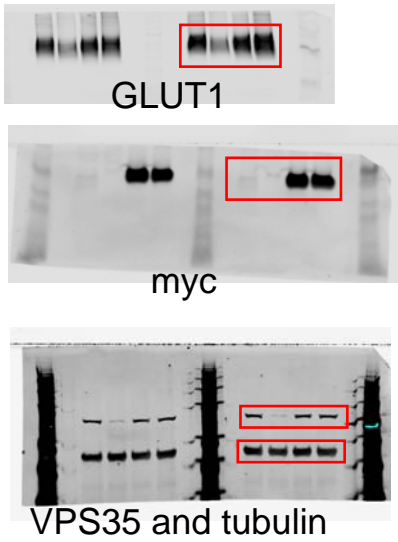

same membrane as myc blot , developed with VPS29 antibody and ECL:

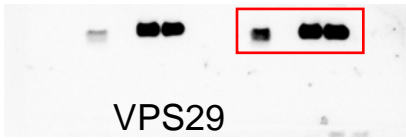

**B**

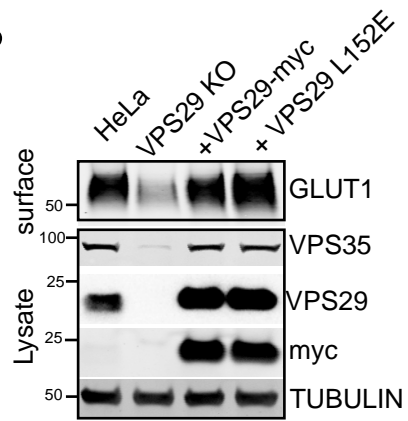

Supplement: EMBJ-37-235-s009.pdf [file EMBJ-37-235-s009.pdf]
