# Supplementary material for: Control of RAB7 activity and localization through the retromer‐TBC1D5 complex enables RAB7‐dependent mitophagy
Source: PubMed Central journal article supplement (PMC5770787; doi:10.15252/embj.201797128), 2017-11-20

Figure 6B: TOM20 degradation

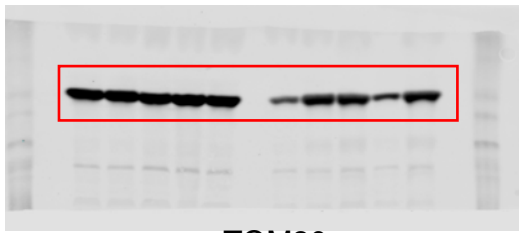

TOM20

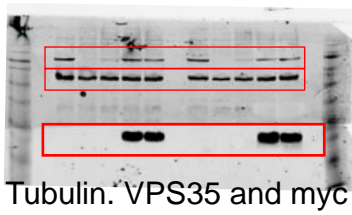

Tubulin, VPS35 and myc

same membrane as myc blot, developed with VPS29 antibody and ECL:

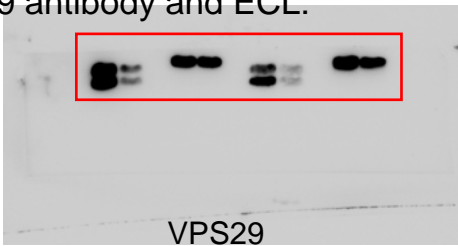

VPS29

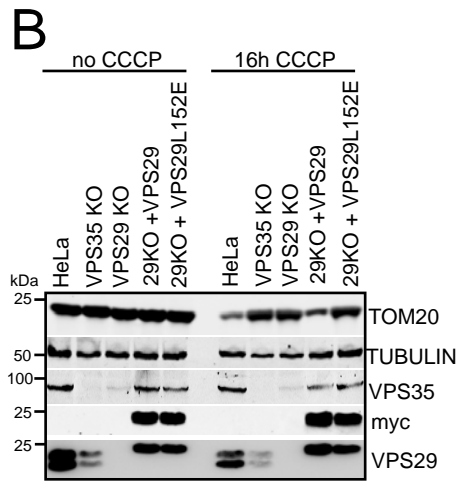

Figure 6C: VPS35 knockdown control

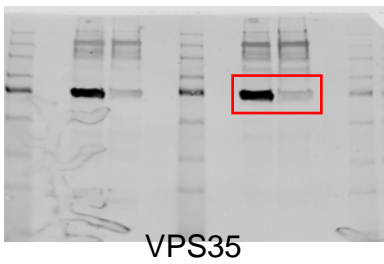

VPS35

same membrane as above in 680nm channel

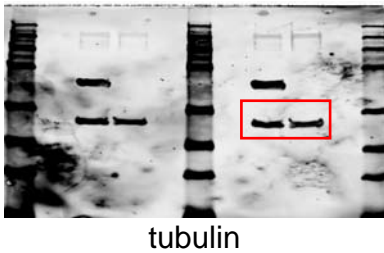

tubulin

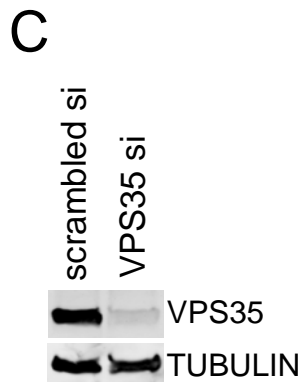

Supplement: EMBJ-37-235-s010.pdf [file EMBJ-37-235-s010.pdf]
